# Supplementary material for: A near complete, chromosome-scale assembly of the black raspberry (Rubus occidentalis) genome
Source: PubMed Central journal article supplement (PMC6131213; doi:10.1093/gigascience/giy094), 2018-08-09

# GigaScience

## A near complete, chromosome-scale assembly of the black raspberry (*Rubus occidentalis*) genome --Manuscript Draft--

|                                                      |                                                                                                                                                                                                                                                                                                                                                                                                                                                                                                                                                                                                                                                                                                                                                                                                                                                                                                                                                                                                                                                                                                                                                                                                                                                                                                                                                                                                                                                                                                                                                                                                                                                                                                                                                                                                        |
|------------------------------------------------------|--------------------------------------------------------------------------------------------------------------------------------------------------------------------------------------------------------------------------------------------------------------------------------------------------------------------------------------------------------------------------------------------------------------------------------------------------------------------------------------------------------------------------------------------------------------------------------------------------------------------------------------------------------------------------------------------------------------------------------------------------------------------------------------------------------------------------------------------------------------------------------------------------------------------------------------------------------------------------------------------------------------------------------------------------------------------------------------------------------------------------------------------------------------------------------------------------------------------------------------------------------------------------------------------------------------------------------------------------------------------------------------------------------------------------------------------------------------------------------------------------------------------------------------------------------------------------------------------------------------------------------------------------------------------------------------------------------------------------------------------------------------------------------------------------------|
| <b>Manuscript Number:</b>                            | GIGA-D-18-00032                                                                                                                                                                                                                                                                                                                                                                                                                                                                                                                                                                                                                                                                                                                                                                                                                                                                                                                                                                                                                                                                                                                                                                                                                                                                                                                                                                                                                                                                                                                                                                                                                                                                                                                                                                                        |
| <b>Full Title:</b>                                   | A near complete, chromosome-scale assembly of the black raspberry ( <i>Rubus occidentalis</i> ) genome                                                                                                                                                                                                                                                                                                                                                                                                                                                                                                                                                                                                                                                                                                                                                                                                                                                                                                                                                                                                                                                                                                                                                                                                                                                                                                                                                                                                                                                                                                                                                                                                                                                                                                 |
| <b>Article Type:</b>                                 | Research                                                                                                                                                                                                                                                                                                                                                                                                                                                                                                                                                                                                                                                                                                                                                                                                                                                                                                                                                                                                                                                                                                                                                                                                                                                                                                                                                                                                                                                                                                                                                                                                                                                                                                                                                                                               |
| <b>Funding Information:</b>                          |                                                                                                                                                                                                                                                                                                                                                                                                                                                                                                                                                                                                                                                                                                                                                                                                                                                                                                                                                                                                                                                                                                                                                                                                                                                                                                                                                                                                                                                                                                                                                                                                                                                                                                                                                                                                        |
| <b>Abstract:</b>                                     | <p><b>Background</b><br/>The fragmented nature of most draft plant genomes has hindered downstream gene discovery, trait mapping for breeding, and other functional genomics applications. There is a pressing need to improve or finish draft plant genome assemblies.</p> <p><b>Findings</b><br/>Here we present a chromosome-scale assembly of the black raspberry genome using single-molecule real-time (SMRT) PacBio sequencing and Hi-C genome scaffolding. The updated V3 assembly has a contig N50 of 5.1 Mb, representing a ~200-fold improvement over the previous Illumina-based version. Each of the 235 contigs was anchored and oriented into seven chromosomes, correcting several major misassemblies. Black raspberry V3 contains 47 Mb of new sequences including large pericentromeric regions and thousands of previously unannotated protein-coding genes. Among the new genes are hundreds of expanded tandem gene arrays that were collapsed in the Illumina-based assembly. Detailed comparative genomics with the high quality V4 woodland strawberry genome (<i>Fragaria vesca</i>) revealed near perfect 1:1 synteny with dramatic divergence in tandem gene array composition. Lineage-specific tandem gene arrays in black raspberry are related to agronomic traits such as disease resistance and secondary metabolite biosynthesis.</p> <p><b>Conclusions</b><br/>The improved resolution of tandem gene arrays highlights the need to reassemble these highly complex and biologically important regions in draft plant genomes. The updated, high-quality black raspberry reference genome will be useful for comparative genomics across the horticulturally important Rosaceae family and enable the development of marker assisted breeding in <i>Rubus</i>.</p> |
| <b>Corresponding Author:</b>                         | Robert VanBuren<br><br>UNITED STATES                                                                                                                                                                                                                                                                                                                                                                                                                                                                                                                                                                                                                                                                                                                                                                                                                                                                                                                                                                                                                                                                                                                                                                                                                                                                                                                                                                                                                                                                                                                                                                                                                                                                                                                                                                   |
| <b>Corresponding Author Secondary Information:</b>   |                                                                                                                                                                                                                                                                                                                                                                                                                                                                                                                                                                                                                                                                                                                                                                                                                                                                                                                                                                                                                                                                                                                                                                                                                                                                                                                                                                                                                                                                                                                                                                                                                                                                                                                                                                                                        |
| <b>Corresponding Author's Institution:</b>           |                                                                                                                                                                                                                                                                                                                                                                                                                                                                                                                                                                                                                                                                                                                                                                                                                                                                                                                                                                                                                                                                                                                                                                                                                                                                                                                                                                                                                                                                                                                                                                                                                                                                                                                                                                                                        |
| <b>Corresponding Author's Secondary Institution:</b> |                                                                                                                                                                                                                                                                                                                                                                                                                                                                                                                                                                                                                                                                                                                                                                                                                                                                                                                                                                                                                                                                                                                                                                                                                                                                                                                                                                                                                                                                                                                                                                                                                                                                                                                                                                                                        |
| <b>First Author:</b>                                 | Robert VanBuren                                                                                                                                                                                                                                                                                                                                                                                                                                                                                                                                                                                                                                                                                                                                                                                                                                                                                                                                                                                                                                                                                                                                                                                                                                                                                                                                                                                                                                                                                                                                                                                                                                                                                                                                                                                        |
| <b>First Author Secondary Information:</b>           |                                                                                                                                                                                                                                                                                                                                                                                                                                                                                                                                                                                                                                                                                                                                                                                                                                                                                                                                                                                                                                                                                                                                                                                                                                                                                                                                                                                                                                                                                                                                                                                                                                                                                                                                                                                                        |
| <b>Order of Authors:</b>                             | Robert VanBuren<br>Ching Man Wai<br>Marivi Colle<br>Jie Wang<br>Shawn Sullivan<br>Jill M Bushakra                                                                                                                                                                                                                                                                                                                                                                                                                                                                                                                                                                                                                                                                                                                                                                                                                                                                                                                                                                                                                                                                                                                                                                                                                                                                                                                                                                                                                                                                                                                                                                                                                                                                                                      |

|                                                                                                                                                                                                                                                                                                                                                                                                                                                                                                                               |                 |
|-------------------------------------------------------------------------------------------------------------------------------------------------------------------------------------------------------------------------------------------------------------------------------------------------------------------------------------------------------------------------------------------------------------------------------------------------------------------------------------------------------------------------------|-----------------|
|                                                                                                                                                                                                                                                                                                                                                                                                                                                                                                                               | Ivan Liachko    |
|                                                                                                                                                                                                                                                                                                                                                                                                                                                                                                                               | Kelly Vining    |
|                                                                                                                                                                                                                                                                                                                                                                                                                                                                                                                               | Michael Dossett |
|                                                                                                                                                                                                                                                                                                                                                                                                                                                                                                                               | Chad Finn       |
|                                                                                                                                                                                                                                                                                                                                                                                                                                                                                                                               | David Chagne    |
|                                                                                                                                                                                                                                                                                                                                                                                                                                                                                                                               | Rubina Jibran   |
|                                                                                                                                                                                                                                                                                                                                                                                                                                                                                                                               | Kevin Childs    |
|                                                                                                                                                                                                                                                                                                                                                                                                                                                                                                                               | Patrick P Edger |
|                                                                                                                                                                                                                                                                                                                                                                                                                                                                                                                               | Todd C Mockler  |
|                                                                                                                                                                                                                                                                                                                                                                                                                                                                                                                               | Nahla V Bassil  |
| <b>Order of Authors Secondary Information:</b>                                                                                                                                                                                                                                                                                                                                                                                                                                                                                |                 |
| <b>Opposed Reviewers:</b>                                                                                                                                                                                                                                                                                                                                                                                                                                                                                                     |                 |
| <b>Additional Information:</b>                                                                                                                                                                                                                                                                                                                                                                                                                                                                                                |                 |
| <b>Question</b>                                                                                                                                                                                                                                                                                                                                                                                                                                                                                                               | <b>Response</b> |
| Are you submitting this manuscript to a special series or article collection?                                                                                                                                                                                                                                                                                                                                                                                                                                                 | No              |
| <b>Experimental design and statistics</b><br><br>Full details of the experimental design and statistical methods used should be given in the Methods section, as detailed in our <a href="#">Minimum Standards Reporting Checklist</a> . Information essential to interpreting the data presented should be made available in the figure legends.<br><br>Have you included all the information requested in your manuscript?                                                                                                  | Yes             |
| <b>Resources</b><br><br>A description of all resources used, including antibodies, cell lines, animals and software tools, with enough information to allow them to be uniquely identified, should be included in the Methods section. Authors are strongly encouraged to cite <a href="#">Research Resource Identifiers</a> (RRIDs) for antibodies, model organisms and tools, where possible.<br><br>Have you included the information requested as detailed in our <a href="#">Minimum Standards Reporting Checklist</a> ? | Yes             |
| <b>Availability of data and materials</b>                                                                                                                                                                                                                                                                                                                                                                                                                                                                                     | Yes             |

All datasets and code on which the conclusions of the paper rely must be either included in your submission or deposited in [publicly available repositories](#) (where available and ethically appropriate), referencing such data using a unique identifier in the references and in the “Availability of Data and Materials” section of your manuscript.

Have you have met the above requirement as detailed in our [Minimum Standards Reporting Checklist?](#)

1  
2  
3  
4 1 **A near complete, chromosome-scale assembly of the black raspberry (*Rubus occidentalis*)**  
5 2 **genome**

7 3 Robert VanBuren<sup>1,2\*</sup>, Ching Man Wai<sup>1</sup>, Marivi Colle<sup>1</sup>, Jie Wang<sup>3</sup>, Shawn Sullivan<sup>4</sup>, Jill M  
8 4 Bushakra<sup>5</sup>, Ivan Liachko<sup>4</sup>, Kelly J Vining<sup>6</sup>, Michael Dossett<sup>6</sup>, Chad E Finn<sup>7</sup>, Rubina Jibran<sup>8</sup>,  
9 5 David Chagné<sup>8</sup>, Kevin Childs<sup>3</sup>, Patrick P. Edger<sup>1</sup>, Todd C. Mockler<sup>9</sup>, Nahla V Bassil<sup>5</sup>

12 6 <sup>1</sup>Department of Horticulture, Michigan State University, East Lansing, MI, 48824, USA

13 7 <sup>2</sup>Plant Resilience Institute, Michigan State University, East Lansing, MI, 48824, USA

14 8 <sup>3</sup>Department of Plant Biology, Michigan State University, East Lansing, MI, 48824, USA

15 9 <sup>4</sup>Phase Genomics, Seattle, WA, 98195, USA

17 10 <sup>5</sup>USDA-ARS National Clonal Germplasm Repository, 33447 Peoria Rd., Corvallis, OR, 97333, USA

18 11 <sup>6</sup>Blueberry Council (in Partnership with Agriculture and Agri-Food Canada) Agassiz Food Research  
19 12 Centre, BC V0M 1A0, Canada

21 13 <sup>7</sup>USDA-ARS Horticultural Crops Research Unit, Corvallis, OR 97330, USA

22 14 <sup>8</sup>The New Zealand Institute for Plant & Food Research Limited, Private Bag 11600, Palmerston North  
23 15 4474, New Zealand

24 16 <sup>9</sup>The Donald Danforth Plant Science Center, St. Louis, MO 63132, USA

27 18 \* corresponding author: [bobvanburen@gmail.com](mailto:bobvanburen@gmail.com)

29 19 **Abstract**

31 20 *Background*

32 21 The fragmented nature of most draft plant genomes has hindered downstream gene discovery,  
33 22 trait mapping for breeding, and other functional genomics applications. There is a pressing need  
34 23 to improve or finish draft plant genome assemblies.

36 24 *Findings*

38 25 Here we present a chromosome-scale assembly of the black raspberry genome using single-  
39 26 molecule real-time (SMRT) PacBio sequencing and Hi-C genome scaffolding. The updated V3  
40 27 assembly has a contig N50 of 5.1 Mb, representing a ~200-fold improvement over the previous  
41 28 Illumina-based version. Each of the 235 contigs was anchored and oriented into seven  
42 29 chromosomes, correcting several major misassemblies. Black raspberry V3 contains 47 Mb of  
43 30 new sequences including large pericentromeric regions and thousands of previously unannotated  
44 31 protein-coding genes. Among the new genes are hundreds of expanded tandem gene arrays that  
45 32 were collapsed in the Illumina-based assembly. Detailed comparative genomics with the high  
46 33 quality V4 woodland strawberry genome (*Fragaria vesca*) revealed near perfect 1:1 synteny with  
47 34 dramatic divergence in tandem gene array composition. Lineage-specific tandem gene arrays in  
48 35 black raspberry are related to agronomic traits such as disease resistance and secondary  
49 36 metabolite biosynthesis.

53 37 *Conclusions*

54 38 The improved resolution of tandem gene arrays highlights the need to reassemble these highly  
55 39 complex and biologically important regions in draft plant genomes. The updated, high-quality  
56 40 black raspberry reference genome will be useful for comparative genomics across the  
57 41 horticulturally important Rosaceae family and enable the development of marker assisted  
58 42 breeding in *Rubus*.

1  
2  
3  
4 **43 Introduction**

5  
6  
7 44 To date, over 200 plant genomes have been sequenced including most plants with agronomic  
8  
9 45 value. Notable exceptions include large, polyploid, or otherwise complex genomes and many  
10  
11 46 horticultural, medicinal or orphan crop species[1]. Most plant genomes were assembled using  
12  
13  
14 47 short read (50-500bp), next generation sequencing (NGS)-based approaches such as Illumina and  
15  
16  
17 48 454 pyrosequencing technologies. The low cost and high-throughput of NGS technologies  
18  
19 49 facilitated rapid genomic resource development, but the short read lengths produced low quality  
20  
21  
22 50 assemblies compared to the early Sanger-based plant genomes[1]. NGS-based assemblies  
23  
24 51 contain gaps in repetitive regions that exceed the maximum read lengths, and most genomes  
25  
26  
27 52 have thousands to millions of imbedded sequence gaps. These gaps can span biologically  
28  
29 53 important sequences including tandem gene arrays, repeat dense, and haplotype or homeologous  
30  
31  
32 54 specific regions. Recent advances in single molecule real-time sequencing (SMRT) have  
33  
34 55 overcome the previous limitations of NGS-based approaches and ushered in a new era of  
35  
36 56 ‘platinum quality’ reference genomes[2]. The long read lengths of PacBio- and Nanopore-based  
37  
38  
39 57 SMRT sequencing allow accurate assembly and phasing of complex genomic regions. SMRT  
40  
41 58 sequencing has been used to drastically improve the contiguity of the maize[3], apple[4],  
42  
43  
44 59 woodland strawberry[5], and rice genomes[6] among others.

45  
46  
47 60 Black raspberry (*Rubus occidentalis* L.) is an important specialty fruit crop in the US  
48  
49  
50 61 Pacific Northwest that is closely related to the globally commercialized red raspberry (*R. idaeus*  
51  
52 62 L.). Black raspberry has undergone little improvement since its domestication in the late  
53  
54  
55 63 1800s[7] and elite cultivars suffer from limited genetic diversity[8, 9]. Genomic resources for  
56  
57 64 *Rubus* are needed to accelerate marker assisted selection and improvement. The black raspberry  
58  
59  
60 65 genome was sequenced using an NGS-based approach, yielding a fragmented but much needed  
61  
62  
63  
64  
65

1  
2  
3  
4 66 draft assembly[10]. This draft was anchored into a chromosome scale assembly using a Hi-C-  
5  
6 67 based scaffolding approach, but the reference used for scaffolding is ~ 50 Mb smaller than the  
7  
8  
9 68 estimated genome size, and is likely missing important genomic features. Here we utilized long  
10  
11 69 read PacBio sequencing and Hi-C to finish and re-annotate the black raspberry genome. The  
12  
13  
14 70 updated V3 reference is nearly complete and includes thousands of new genes making it useful  
15  
16 71 for the plant comparative genomics and *Rubus* breeding communities.  
17  
18  
19  
20 72  
21  
22

## 23 73 **Results**

24  
25  
26 74 To improve the black raspberry reference genome, we generated 2.1 million PacBio reads  
27  
28  
29 75 collectively spanning 21.8 Gb or 76x genome coverage. The PacBio data has a subread N50  
30  
31 76 length of 11.5 kb, average length of 9.8 kb, and maximum length of 72 kb (Supplemental Figure  
32  
33  
34 77 1). PacBio reads shorter than 1 kb were discarded and reads longer than 10 kb were used as seeds  
35  
36 78 for error correction and assembly using the Canu assembler [11]. The Canu-based assembly was  
37  
38  
39 79 improved by two rounds of polishing with Pilon [12] using high coverage (~80x) paired-end  
40  
41 80 Illumina data to correct residual insertion/deletion errors. The final assembly has a contig N50 of  
42  
43  
44 81 5.1 Mb across 235 contigs and total size of 290 Mb (Table 1). This represents a ~200x  
45  
46 82 improvement in contiguity compared to the Illumina-only assembly and includes over 47 Mb of  
47  
48  
49 83 additional sequences. Newly assembled sequences consist of mostly repetitive elements but also  
50  
51 84 include regions containing protein coding genes (described below). The Canu assembly graph is  
52  
53  
54 85 free of bubbles associated with heterozygous regions but there is some graph complexity  
55  
56 86 resulting from high copy number repetitive elements (Figure 1b).  
57  
58  
59  
60  
61  
62  
63  
64  
65

1  
2  
3  
4 87 The PacBio-based contigs were assembled into scaffolds and then into pseudomolecules  
5  
6 88 using high-throughput chromatin conformation capture (Hi-C) and Proximity-Guided Assembly  
7  
8  
9 89 (PGA). This approach was previously used to cluster and order 9,650 of the 11,936 V1 black  
10  
11 90 raspberry contigs into seven pseudomolecules spanning 223.8 Mb (97.3% of the assembly). The  
12  
13  
14 91 Illumina-based Hi-C data was remapped to the PacBio assembly and clustered into seven  
15  
16 92 pseudomolecules using the Proximo Hi-C scaffolding pipeline (Figure 1c). The Hi-C scaffolding  
17  
18  
19 93 was able to anchor and order with high confidence all 235 contigs into seven pseudomolecules  
20  
21 94 with sizes ranging from 34 Mb to 51 Mb with an N50 of 41.1 Mb (Table 2). The  
22  
23  
24 95 pseudomolecules were assigned to the seven haploid black raspberry chromosomes (Ro01-Ro07)  
25  
26 96 using markers from sequence-based genetic maps as anchors[13]. We used PBJelly[14] to fill  
27  
28  
29 97 gaps in the pseudomolecules with error-corrected PacBio reads exceeding 10 kb in length. This  
30  
31 98 approach successfully filled 16 of the 228 gaps and the remaining gaps are likely either complex  
32  
33  
34 99 or highly repetitive with non-unique junctions exceeding read lengths.

35  
36  
37 100 The combined PacBio and Hi-C assembly (hereon referred to as V3) contains 10 terminal  
38  
39 101 telomeric tracks at both ends of chromosomes Ro02, Ro03, Ro05, and Ro07, and one end of  
40  
41 102 Ro01 and Ro04, validating the accuracy and quality of our assembly (Figure 2). We identified a  
42  
43  
44 103 novel 317 bp centromeric repeat with high abundance in six of the seven chromosomes.  
45  
46 104 Centromeric repeat array sizes range from 110 elements in Ro01 to 1,204 in Ro04 with element  
47  
48  
49 105 homologies averaging 89% (Supplemental Table 1). The presence of centromeric arrays,  
50  
51 106 repetitive element density, and Hi-C-based intra-chromosomal interactions allowed us to  
52  
53  
54 107 estimate the centromere size in each chromosome. Black raspberry chromosomes have an  
55  
56 108 average centromere size of 2.8 Mb with individual sizes ranging from 173 kb in Ro01 to 5.2 Mb  
57  
58  
59 109 in Ro03. Ro06 contained only four centromeric repeats with no obvious enrichment of repetitive  
60  
61  
62  
63  
64  
65

1  
2  
3  
4 110 elements or reduction in intra-chromosomal interactions based on the Hi-C data, suggesting the  
5  
6 111 centromeric region of this chromosome is still largely unassembled. The proportion of long  
7  
8 112 terminal repeat (LTR) retrotransposons in the black raspberry genome nearly doubled with an  
9  
10 113 increase from 16.2% in V1 to 32.6% in V3. Intact LTR retrotransposons are a metric for  
11  
12 114 assembly quality and the number of intact elements increased from 258 in V1 to 2,342 in V3.  
13  
14 115 LTR and gene density are inversely correlated, with pericentromeric and subtelomeric regions  
15  
16 116 having the highest LTR density (Figure 2). Together, the accurate assembly of highly repetitive  
17  
18 117 regions and relatively low number of remaining sequence gaps suggest the V3 black raspberry  
19  
20 118 assembly is nearly complete.  
21  
22  
23  
24  
25  
26

27 119 We aligned the V3 black raspberry assembly to the V1 pseudomolecules to assess  
28  
29 120 genome collinearity. We identified numerous misassemblies in V1 spanning most of the genome  
30  
31 121 (Figure 1a). Misassembled regions range from small-scale inversions reflecting incorrect  
32  
33 122 scaffold orientation, to major chromosome arm-sized inversions in Ro06 and Ro07. The  
34  
35 123 pericentromeric regions are largely unassembled in V1 resulting in large gaps in the syntenic dot  
36  
37 124 plots. Major gaps are also found throughout genic regions in the genome. The errors in V1 likely  
38  
39 125 stem from read length limitations of NGS data and errors in marker order from the genetic maps  
40  
41 126 that were used to build the pseudomolecules. A similar level of scaffold misassembly was  
42  
43 127 observed in the comparison of PacBio based V4 woodland strawberry genome to the previous  
44  
45 128 Illumina based genome[5]. Such errors are probably common in most NGS-based plant genomes  
46  
47 129 and are hindering marker assisted breeding efforts.  
48  
49  
50  
51  
52  
53

54 130 The V3 black raspberry assembly includes 43 Mb of new sequences that was  
55  
56 131 unassembled in the V1 reference. We re-annotated the V3 assembly *ab initio* using the MAKER-  
57  
58 132 P pipeline [15]. Ten RNAseq datasets from a diverse tissue atlas were assembled with StringTie  
59  
60  
61  
62  
63  
64  
65



1  
2  
3  
4  
5  
6  
7  
8  
9  
10  
11  
12  
13  
14  
15  
16  
17  
18  
19  
20  
21  
22  
23  
24  
25  
26  
27  
28  
29  
30  
31  
32  
33  
34  
35  
36  
37  
38  
39  
40  
41  
42  
43  
44  
45  
46  
47  
48  
49  
50  
51  
52  
53  
54  
55  
56  
57  
58  
59  
60  
61  
62  
63  
64  
65

[16] and used as transcript evidence and gene models from the diploid strawberry (*Fragaria vesca*) [5] and Arabidopsis (TAIR10) [17] genomes were used as protein evidence. The new annotation has 34,545 high-confidence gene models, substantially more than the 28,005 models in the V1 assembly. We assessed annotation quality using the Benchmarking Universal Single-Copy Orthologs (BUSCO) [18] pipeline and found 94% (1,352 out of 1,440) of the genes in the embryophyta dataset present in the V3 assembly, compared to 87% in the V1 black raspberry reference. This proportion is similar to other recent PacBio based genomes [2, 5, 19] and suggests the annotation is of high quality. The V3 annotation includes 9,301 new gene models that were improved or absent from the V1 assembly and 4,020 low-quality gene models from V1 were removed in V3. The discarded gene models had insufficient transcript or protein support, or transposable element related annotations. Most of the newly annotated genes (6,070 out of 9,301) have detectable expression in the gene expression atlas including many with tissue-specific expression patterns (Supplemental Figure 2).

The V3 black raspberry annotation has a striking increase in the size and number of tandem gene arrays. Tandem gene duplicates (TDs) with high sequence homology often collapse into single gene copies during the assembly of NGS data and are likely underrepresented in most genomes. We identified 7,453 TDs in the V3 assembly compared to 4,333 in V1. Tandem arrays range in size from 2 to 26 copies with an average size of 4. Large tandem arrays show the greatest improvement in assembly accuracy, with the most dramatic increase from four copies in V1 to 26 in V3 (Figure 3). Tandem arrays with more than 10 genes have, on average, 52% more annotated copies in V3. Tandem arrays with 5-9 genes have, on average, 31% more annotated copies in V3. Most arrays with 2 or 3 TDs are unchanged in the V3 assembly and 16% of arrays

1  
2  
3  
4 155 were completely novel, with no homology to gene models in V1. Some differences in tandem  
5  
6  
7 156 array length are likely due to improvements in the annotation.  
8  
9

10 157         Black raspberry is in the Rosaceae, a large and diverse family that includes peach, pear,  
11  
12 158 apple, strawberry, cherry, plum, rose, and almonds among other important horticultural crops.  
13  
14 159 Genomes are available for many of these crop species providing an excellent framework for  
15  
16 160 comparative functional genomic analyses. The closest crop relatives of black raspberry are the  
17  
18 161 cultivated strawberries (*Fragaria* sp.), with the most common recent ancestor of these two  
19  
20 162 species having diverged ~75 million years ago (MYA) [20]. Woodland strawberry (*F. vesca*) and  
21  
22 163 black raspberry have the same karyotype ( $2n=14$ ) and previous genetic map and genomic  
23  
24 164 analyses suggested a high degree of collinearity[10]. We utilized the PacBio based V4 *F. vesca*  
25  
26 165 assembly[5] to make detailed comparisons between these two species. Despite the 75 MY  
27  
28 166 divergence, the black raspberry and *F. vesca* genomes are largely collinear (Figure 4).  
29  
30  
31  
32 167 Ro01/Fvb1, Ro02/Fvb2, and Ro03/Fvb3 have no major structural rearrangements and the other  
33  
34 168 four chromosome pairs have one or two major inversions (Figure 4a). Surprisingly, there are no  
35  
36 169 translocations between chromosomes in either species. Over 96% of collinear blocks have 1:1  
37  
38 170 syntenic depth with no large-scale segmental duplications. The black raspberry and *F. vesca*  
39  
40 171 genomes have 15,727 syntenic gene pairs which is consistent with other similarly diverged  
41  
42 172 lineages such as species within the Poaceae [2, 21]. The black raspberry and *F. vesca* genomes  
43  
44 173 are similar in size (290 vs. 240 Mb, respectively) and each genome has unique patterns of  
45  
46 174 expansion based on microsynteny (Figure 4c). We identified 615 syntenic tandem gene arrays  
47  
48 175 that are conserved between *F. vesca* and black raspberry, and 1,231 that are unique in either  
49  
50 176 species. Syntenic TDs range in copy number, and no TDs with more than three copies have the  
51  
52 177 same array size in both species. Most of the lineage-specific syntenic TDs have two or three  
53  
54  
55  
56  
57  
58  
59  
60  
61  
62  
63  
64  
65

1  
2  
3  
4 178 copies, but we identified 16 arrays with more than ten copies in black raspberry and only one  
5  
6 179 copy in *F. vesca* (Supplementary Table 2). The most notable example is an expanded array of  
7  
8  
9 180 nucleotide-binding site leucine-rich repeat (NBS-LRR) proteins with 26 copies in black  
10  
11 181 raspberry with only one copy in that gene in *F. vesca*. NBS-LRR proteins are involved in  
12  
13  
14 182 pathogen detection and are associated with many cloned disease resistance QTL [22].  
15  
16

17 183         The drastic improvements in the V3 black raspberry genome highlight the need to re-  
18  
19 184 evaluate and improve most draft plant genomes. The cost of SMRT sequencing is continually  
20  
21  
22 185 decreasing, making it feasible to re-assemble even large and complex plant genomes. Most of the  
23  
24 186 newly assembled black raspberry sequences are repetitive, but other collapsed regions such as  
25  
26  
27 187 tandem gene arrays were also drastically improved. Gene duplications drive evolutionary  
28  
29 188 innovation [23] and these regions likely underlie important domestication and improvement  
30  
31  
32 189 related traits. Improving or finishing draft assemblies will help accelerate fundamental and  
33  
34 190 applied plant research.  
35  
36

37 191  
38  
39

## 40 192 **Methods:**

### 43 193 **DNA extraction and genome assembly**

44  
45  
46 194 High molecular weight (HMW) genomic DNA (gDNA) was isolated from young leaf tissue of  
47  
48  
49 195 black raspberry selection ORUS 4115-3 using a modified nuclei preparation method[24]. A 20  
50  
51  
52 196 kb insert library was constructed from the HMW gDNA followed by size selection on the  
53  
54 197 BluePippin (Safe Science) and sequencing on a PacBio RSII platform using P6-C4 chemistry.  
55  
56 198 Raw PacBio reads were corrected and assembled using the Canu assembler (V1.4)[11]. The  
57  
58  
59 199 following parameters were modified: minReadLength=2000, GenomeSize=290Mb,  
60  
61  
62  
63  
64  
65

1  
2  
3  
4  
5  
6  
7  
8  
9  
10  
11  
12  
13  
14  
15  
16  
17  
18  
19  
20  
21  
22  
23  
24  
25  
26  
27  
28  
29  
30  
31  
32  
33  
34  
35  
36  
37  
38  
39  
40  
41  
42  
43  
44  
45  
46  
47  
48  
49  
50  
51  
52  
53  
54  
55  
56  
57  
58  
59  
60  
61  
62  
63  
64  
65

200 minOverlapLength=1000. Other parameters were left as default. The PacBio-based contigs were  
201 polished with Pilon (V1.22) [12] using ~80x Illumina data from the V1 black raspberry draft  
202 genome assembly [10]. Quality-trimmed Illumina reads were aligned to the draft PacBio-based  
203 contigs using bowtie2 (V2.3.0)[25] with default parameters. The alignment rate of Illumina data  
204 was ~98%, supporting the completeness of our assembly. Illumina reads were realigned around  
205 insertions/deletions using the IndelRealigner function from the genome analysis tool kit (GATK;  
206 V3.7)[26]. The parameters for Pilon were as follows: --flank 7, --K 49, and --mindepth 20. Pilon  
207 was run a second time using the polished contigs as a reference to correct any residual errors.  
208 After two rounds of polishing, 431,421 indels and 95,322 single nucleotide polymorphisms were  
209 corrected in the assembly.

210  
211 **Pseudomolecule construction and validation**

212 Hi-C library construction and sequencing was previously reported. In total, 54.4 million Hi-C  
213 read pairs were generated and used as input to the Proximo Hi-C scaffolding pipeline. Reads  
214 were aligned to the polished PacBio contigs using bwa (V0.7.16)[27] with strict parameters (-n  
215 0) to prevent mismatches and non-specific alignments. Only read pairs that aligned to different  
216 contigs were used for scaffolding. The Proximo Hi-C pipeline performed chromosome clustering  
217 and contig orientation as described previously[28]. Briefly, Proximo utilizes an enhanced version  
218 of the LACHESIS algorithm as well as scaffold optimization and extra quality control steps to  
219 group and orient contigs based on interaction probabilities. Hi-C interactions binned the contigs  
220 into seven groups (corresponding to the haploid chromosomes) and successfully oriented all 235  
221 contigs. Pseudomolecules were assigned to chromosomes using SSR and GBS based markers  
222 from high density genetic maps[13]. Gaps in the pseudomolecules were filled using error-

1  
2  
3  
4 223 corrected PacBio reads with PBJelly (V 15.8.24)[14] using default parameters. This near  
5  
6  
7 224 complete version has been designated as V3.  
8  
9

10 225

## 13 226 **Genome annotation**

15  
16 227 The MAKER-P pipeline[15] was used to annotate the V3 assembly. Ten RNAseq datasets  
17  
18 228 (described below) used as transcript evidence and gene models from the diploid strawberry (*F.*  
19  
20 229 *vesca*) [5] and Arabidopsis (TAIR10)[17] genomes were used as protein evidence. The RNAseq  
21  
22 230 samples were assembled into transcripts using a reference-guided approach with StringTie  
23  
24 231 (V1.3.3)[16]. A custom LTR retrotransposon library was created using the LTR\_retriever  
25  
26 232 pipeline[29]. This custom library was used in conjunction with the MAKER repeat library for  
27  
28 233 masking prior to annotation. *Ab initio* gene prediction was performed using SNAP and Augustus  
29  
30 234 with three and two rounds of reiterative training respectively. The resulting gene set was filtered  
31  
32 235 to remove gene models containing Pfam domains related to transposable elements resulting in an  
33  
34 236 annotation of 33,286 high-confidence gene models. 34,545 Annotation quality was assessed  
35  
36 237 using the Benchmarking Universal Single-Copy Orthologs (BUSCO; V3)[18] pipeline with the  
37  
38 238 embryophyta dataset of 1,440 single-copy conserved genes.  
39  
40  
41  
42  
43  
44  
45

46 239

## 49 240 **Expression analysis**

51  
52 241 To build a gene expression atlas, RNA was collected from ten diverse black raspberry tissues.  
53  
54 242 This includes: green berries, red berries, ripe berries, flowers, canes, roots, leaves, and methyl  
55  
56 243 jasmonate-treated leaf tissue. Fresh tissue was flash-frozen in liquid nitrogen and total RNA was  
57  
58 244 extracted using KingFisher Pure RNA Plant kit (Thermo Fisher Scientific, MA), according to the  
59  
60  
61  
62  
63  
64  
65

1  
2  
3  
4 245 manufacturer's instructions. Two micrograms of total RNA was used to construct stranded  
5  
6 246 mRNA libraries (KAPA mRNA HyperPrep kit, KAPA Biosystems, Roche, USA). Multiplexed,  
7  
8  
9 247 pooled libraries were sequenced on the Illumina HiSeq4000 under paired-end 150 nt mode in the  
10  
11 248 genomics core at Michigan State University. Raw reads were trimmed using Trimmomatic (V  
12  
13  
14 249 0.33)[30] and aligned to the black raspberry V3 genome using the STAR aligner[31]. Reads were  
15  
16 250 then assembled using a reference-guided approach with StringTie (V1.3.3)[16] and output as  
17  
18  
19 251 read count tables. Expression analyses were performed using the DESeq2 pipeline[32] and  
20  
21 252 visualized using the pheatmap R package[33].  
22  
23

24  
25 253  
26

## 27 254 **Comparative genomics**

28  
29  
30  
31 255 The black raspberry V3 genome was compared to the black raspberry V1[10] and *F. vesca* V4[5]  
32  
33 256 genomes using the MCSScan toolkit (V1.1)[34]. Syntenic gene pairs were identified using all vs.  
34  
35 257 all BLAST followed by filtering for 1:1 collinear pairs with MCSScan. Tandem gene duplicates  
36  
37  
38 258 were identified using a minimum e-value of  $10^{-5}$  and maximum gene distance of 10 genes. Pair-  
39  
40 259 wise, macrosynteny, and microsynteny plots were constructed using the python version of  
41  
42  
43 260 MCSScan: ([https://github.com/tanghaibao/jcvi/wiki/MCscan-\(Python-version\)](https://github.com/tanghaibao/jcvi/wiki/MCscan-(Python-version))).  
44  
45

46 261  
47  
48

49 262 **Availability of supporting data:** The updated black raspberry V3 assembly and annotation can  
50  
51 263 be downloaded from CoGe (<https://genomeevolution.org/coge>) under Genome ID 37280 and the  
52  
53  
54 264 genome database for Rosaceae (<https://www.rosaceae.org/>). The raw sequence data have been  
55  
56 265 deposited in the Short Read Archive (SRA) under NCBI BioProject ID PRJNA430858.  
57  
58

59 266  
60  
61  
62  
63  
64  
65

1  
2  
3  
4  
5  
6  
7  
8  
9  
10  
11  
12  
13  
14  
15  
16  
17  
18  
19  
20  
21  
22  
23  
24  
25  
26  
27  
28  
29  
30  
31  
32  
33  
34  
35  
36  
37  
38  
39  
40  
41  
42  
43  
44  
45  
46  
47  
48  
49  
50  
51  
52  
53  
54  
55  
56  
57  
58  
59  
60  
61  
62  
63  
64  
65

267 **Competing Interests:** The authors declare that they have no competing interests.

268

269 **Author Contributions:** R.V. and N.V.B. designed research; R.V., Je.W., M.C., Ji.W., S.S.,

270 J.M.B., I.L., K.J.V., M.D., C.E.F., R.J., D.C., K.C., P.P.E., T.C.M. and N.V.B. performed

271 research and/or analyzed data; and R.V. wrote the paper. All authors reviewed the manuscript.

272

273

1  
2  
3  
4  
5  
6  
7  
8  
9  
10  
11  
12  
13  
14  
15  
16  
17  
18  
19  
20  
21  
22  
23  
24  
25  
26  
27  
28  
29  
30  
31  
32  
33  
34  
35  
36  
37  
38  
39  
40  
41  
42  
43  
44  
45  
46  
47  
48  
49  
50  
51  
52  
53  
54  
55  
56  
57  
58  
59  
60  
61  
62  
63  
64  
65

274 **References:**

- 275 1. Michael TP and VanBuren R. Progress, challenges and the future of crop genomes. *Current*  
276 *opinion in plant biology*. 2015;24:71-81.
- 277 2. VanBuren R, Bryant D, Edger PP, Tang H, Burgess D, Challabathula D, et al. Single-molecule  
278 sequencing of the desiccation-tolerant grass *Oropetium thomaeum*. *Nature*. 2015;527  
279 7579:508-11.
- 280 3. Jiao Y, Peluso P, Shi J, Liang T, Stitzer MC, Wang B, et al. Improved maize reference genome with  
281 single-molecule technologies. *Nature*. 2017.
- 282 4. Daccord N, Celton J-M, Linsmith G, Becker C, Choisne N, Schijlen E, et al. High-quality de novo  
283 assembly of the apple genome and methylome dynamics of early fruit development. *Nature*  
284 *Genetics*. 2017.
- 285 5. Edger PP, VanBuren R, Colle M, Poorten TJ, Wai CM, Niederhuth CE, et al. Single-molecule  
286 sequencing and optical mapping yields an improved genome of woodland strawberry (*Fragaria*  
287 *vesca*) with chromosome-scale contiguity. *GigaScience*. 2017.
- 288 6. Du H, Yu Y, Ma Y, Gao Q, Cao Y, Chen Z, et al. Sequencing and de novo assembly of a near  
289 complete indica rice genome. *Nature Communications*. 2017;8:15324.
- 290 7. Jennings DL. *Raspberries and blackberries: their breeding, diseases and growth*. Academic press;  
291 1988.
- 292 8. Dossett M, Bassil NV, Lewers KS and Finn CE. Genetic diversity in wild and cultivated black  
293 raspberry (*Rubus occidentalis* L.) evaluated by simple sequence repeat markers. *Genetic*  
294 *resources and crop evolution*. 2012;59 8:1849-65.
- 295 9. Dossett M, Lee J and Finn CE. Inheritance of phenological, vegetative, and fruit chemistry traits  
296 in black raspberry. *Journal of the American Society for Horticultural Science*. 2008;133 3:408-17.
- 297 10. VanBuren R, Bryant D, Bushakra JM, Vining KJ, Edger PP, Rowley ER, et al. The genome of black  
298 raspberry (*Rubus occidentalis*). *The Plant Journal*. 2016;87 6:535-47.
- 299 11. Koren S, Walenz BP, Berlin K, Miller JR, Bergman NH and Phillippy AM. Canu: scalable and  
300 accurate long-read assembly via adaptive k-mer weighting and repeat separation. *bioRxiv*.  
301 2017:071282.
- 302 12. Walker BJ, Abeel T, Shea T, Priest M, Abouelliel A, Sakthikumar S, et al. Pilon: an integrated tool  
303 for comprehensive microbial variant detection and genome assembly improvement. *PloS one*.  
304 2014;9 11:e112963.
- 305 13. Finn CE, Lee J, VanBuren R, Bassil NV, Bryant DW, Gilmore BS, et al. A genetic linkage map of  
306 black raspberry (*Rubus occidentalis*) and the mapping of Ag (4) conferring resistance to the  
307 aphid *Amphorophora agathonica*. 2015.
- 308 14. English AC, Richards S, Han Y, Wang M, Vee V, Qu J, et al. Mind the gap: upgrading genomes  
309 with Pacific Biosciences RS long-read sequencing technology. *PloS one*. 2012;7 11:e47768.
- 310 15. Campbell MS, Law M, Holt C, Stein JC, Moghe GD, Hufnagel DE, et al. MAKER-P: a tool kit for the  
311 rapid creation, management, and quality control of plant genome annotations. *Plant physiology*.  
312 2014;164 2:513-24.
- 313 16. Perteua M, Perteua GM, Antonescu CM, Chang T-C, Mendell JT and Salzberg SL. StringTie enables  
314 improved reconstruction of a transcriptome from RNA-seq reads. *Nature biotechnology*.  
315 2015;33 3:290-5.
- 316 17. Lamesch P, Berardini TZ, Li D, Swarbreck D, Wilks C, Sasidharan R, et al. The Arabidopsis  
317 Information Resource (TAIR): improved gene annotation and new tools. *Nucleic acids research*.  
318 2011;40 D1:D1202-D10.



1  
2  
3  
4  
5  
6  
7  
8  
9  
10  
11  
12  
13  
14  
15  
16  
17  
18  
19  
20  
21  
22  
23  
24  
25  
26  
27  
28  
29  
30  
31  
32  
33  
34  
35  
36  
37  
38  
39  
40  
41  
42  
43  
44  
45  
46  
47  
48  
49  
50  
51  
52  
53  
54  
55  
56  
57  
58  
59  
60  
61  
62  
63  
64  
65

18. Simão FA, Waterhouse RM, Ioannidis P, Kriventseva EV and Zdobnov EM. BUSCO: assessing genome assembly and annotation completeness with single-copy orthologs. *Bioinformatics*. 2015;31 19:3210-2.

19. Jarvis DE, Ho YS, Lightfoot DJ, Schmöckel SM, Li B, Borm TJ, et al. The genome of *Chenopodium quinoa*. *Nature*. 2017;542 7641:307-12.

20. Xiang Y, Huang C-H, Hu Y, Wen J, Li S, Yi T, et al. Evolution of Rosaceae fruit types based on nuclear phylogeny in the context of geological times and genome duplication. *Molecular biology and evolution*. 2016;34 2:262-81.

21. Paterson AH, Bowers JE, Bruggmann R, Dubchak I, Grimwood J, Gundlach H, et al. The *Sorghum bicolor* genome and the diversification of grasses. *Nature*. 2009;457 7229:551-6.

22. Belkhadir Y, Subramaniam R and Dangl JL. Plant disease resistance protein signaling: NBS–LRR proteins and their partners. *Current opinion in plant biology*. 2004;7 4:391-9.

23. Ohno S. Other Mechanisms for Achieving Gene Duplication. *Evolution by Gene Duplication*. Springer; 1970. p. 107-10.

24. Zhang HB, Zhao X, Ding X, Paterson AH and Wing RA. Preparation of megabase-size DNA from plant nuclei. *The Plant Journal*. 1995;7 1:175-84.

25. Langmead B and Salzberg SL. Fast gapped-read alignment with Bowtie 2. *Nature methods*. 2012;9 4:357-9.

26. McKenna A, Hanna M, Banks E, Sivachenko A, Cibulskis K, Kernytzsky A, et al. The Genome Analysis Toolkit: a MapReduce framework for analyzing next-generation DNA sequencing data. *Genome research*. 2010;20 9:1297-303.

27. Li H and Durbin R. Fast and accurate short read alignment with Burrows–Wheeler transform. *Bioinformatics*. 2009;25 14:1754-60.

28. Bickhart DM, Rosen BD, Koren S, Sayre BL, Hastie AR, Chan S, et al. Single-molecule sequencing and chromatin conformation capture enable de novo reference assembly of the domestic goat genome. *Nature Genetics*. 2017;49 4:643-50.

29. Ou S and Jiang N. LTR\_retriever: a highly accurate and sensitive program for identification of long terminal-repeat retrotransposons. *Plant Physiology*. 2017:pp. 01310.2017.

30. Bolger AM, Lohse M and Usadel B. Trimmomatic: a flexible trimmer for Illumina sequence data. *Bioinformatics*. 2014:btu170.

31. Dobin A, Davis CA, Schlesinger F, Drenkow J, Zaleski C, Jha S, et al. STAR: ultrafast universal RNA-seq aligner. *Bioinformatics*. 2013;29 1:15-21.

32. Love MI, Huber W and Anders S. Moderated estimation of fold change and dispersion for RNA-seq data with DESeq2. *Genome biology*. 2014;15 12:550.

33. Kolde R. Pheatmap: pretty heatmaps. R package version. 2012;61.

34. Tang H, Wang X, Bowers JE, Ming R, Alam M and Paterson AH. Unraveling ancient hexaploidy through multiply-aligned angiosperm gene maps. *Genome research*. 2008;18 12:1944-54.

356  
357

1  
2  
3  
4  
5  
6  
7  
8  
9  
10  
11  
12  
13  
14  
15  
16  
17  
18  
19  
20  
21  
22  
23  
24  
25  
26  
27  
28  
29  
30  
31  
32  
33  
34  
35  
36  
37  
38  
39  
40  
41  
42  
43  
44  
45  
46  
47  
48  
49  
50  
51  
52  
53  
54  
55  
56  
57  
58  
59  
60  
61  
62  
63  
64  
65

358 **Figures:**

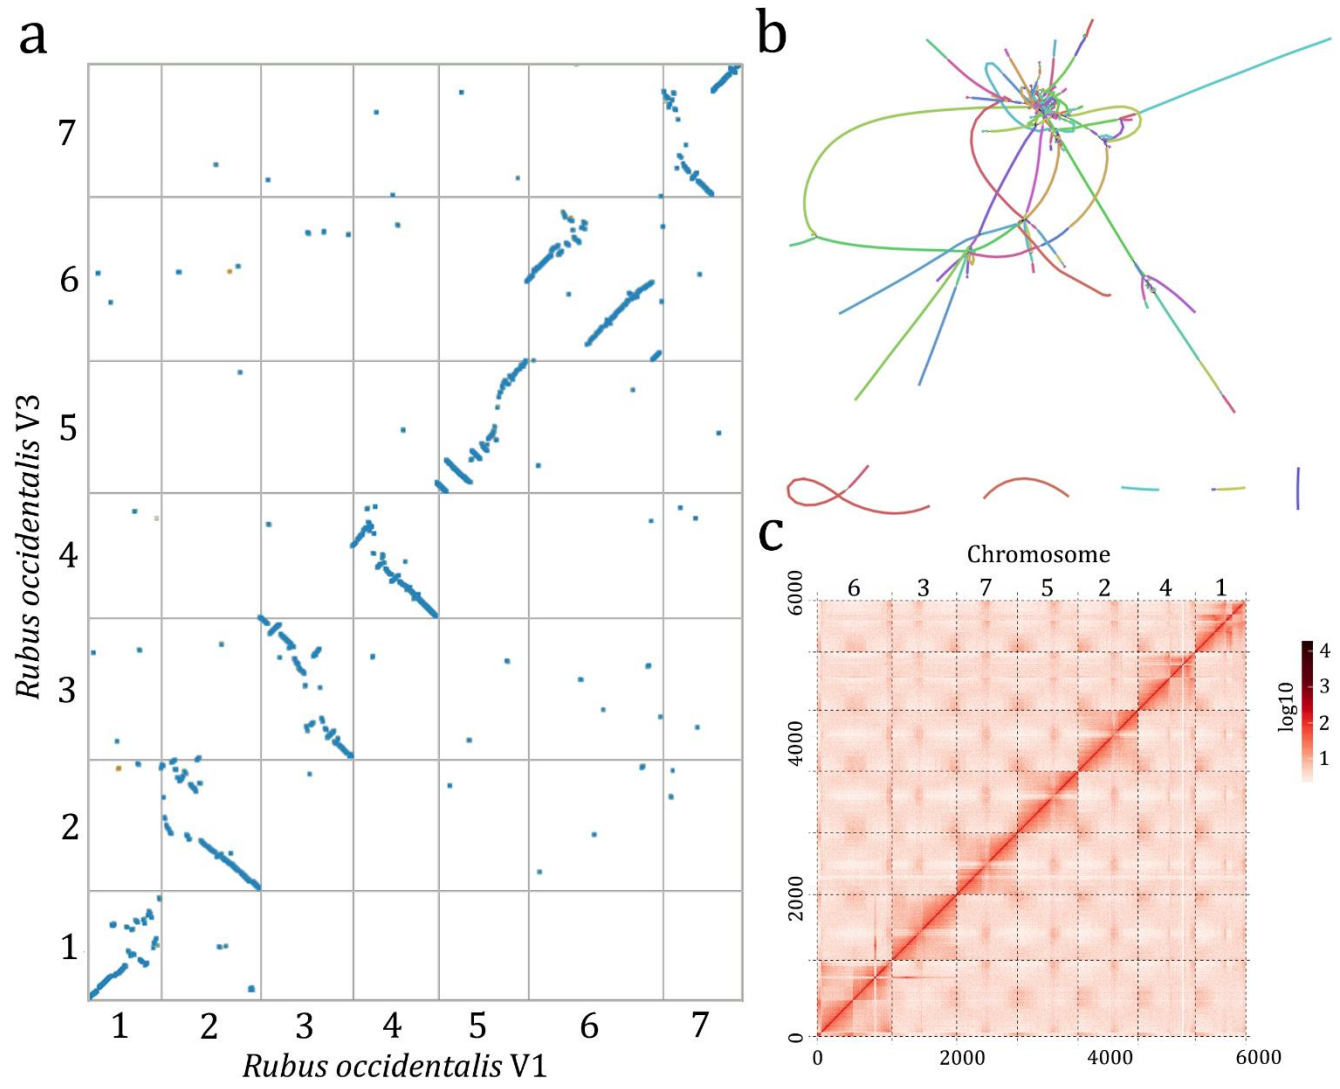

359  
360 **Figure 1. Updated chromosome scale assembly of black raspberry.** (a) Syntenic dotplot of the black  
361 raspberry V1 and V3 assemblies. Each blue point denotes a collinear genomic region. (b) Assembly graph  
362 of the V3 reference. Each line (node) represents a contig in the Canu assembly and connections (edges)  
363 between contigs represent ambiguities in the graph structure. The color of contigs is randomly assigned.  
364 (c) Post-clustering heat map showing density of Hi-C interactions between contigs from the Proximity  
365 Guided Assembly.

366

1  
2  
3  
4  
5  
6  
7  
8  
9  
10  
11  
12  
13  
14  
15  
16  
17  
18  
19  
20  
21  
22  
23  
24  
25  
26  
27  
28  
29  
30  
31  
32  
33  
34  
35  
36  
37  
38  
39  
40  
41  
42  
43  
44  
45  
46  
47  
48  
49  
50  
51  
52  
53  
54  
55  
56  
57  
58  
59  
60  
61  
62  
63  
64  
65

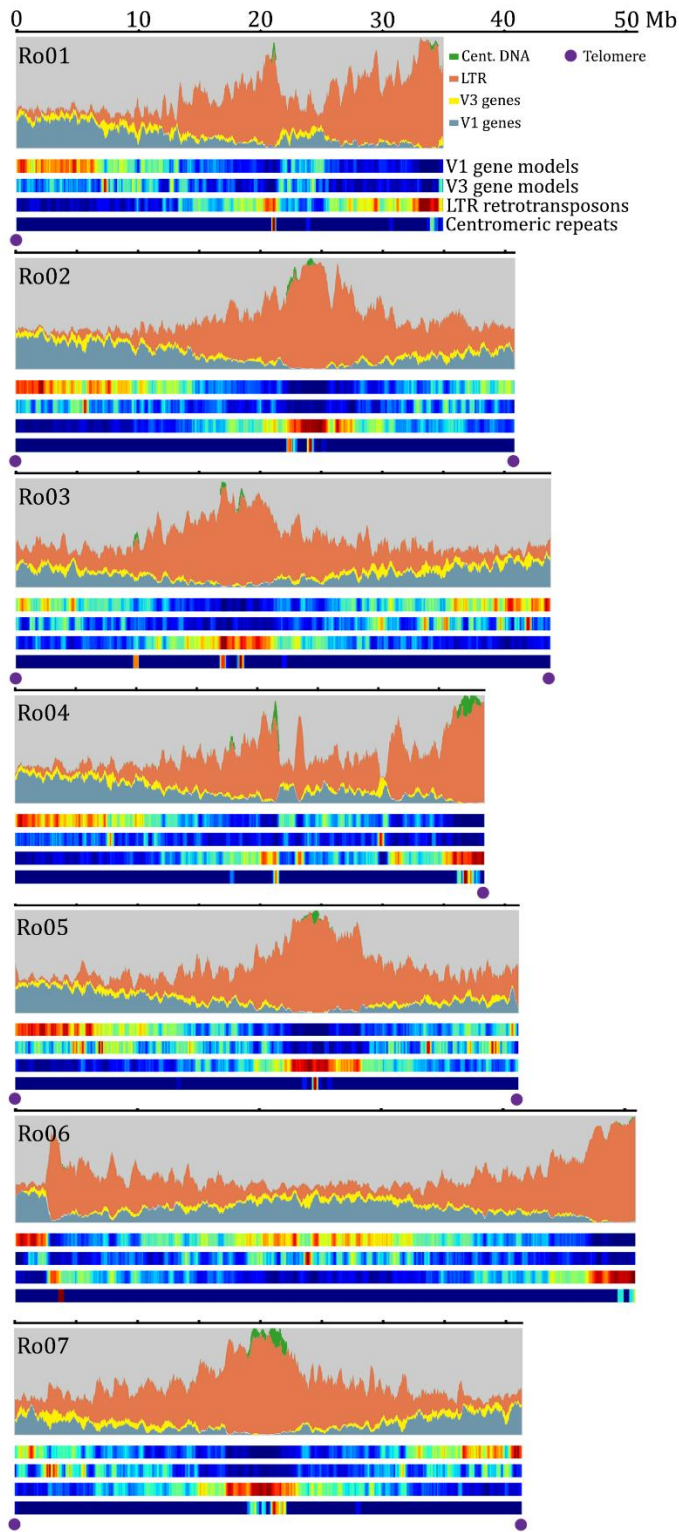

367

368 **Figure 2: Genome landscape of the black raspberry V3 genome.** The composition of long terminal  
369 repeat retrotransposons (LTRs), centromeric repeat arrays (Cent. DNA), gene models carried over from  
370 the V1 assembly, and new gene models in V3 are plotted in 50 kb bins with a 25kb sliding window.  
371 Terminal telomeric repeats are denoted by purple dots.

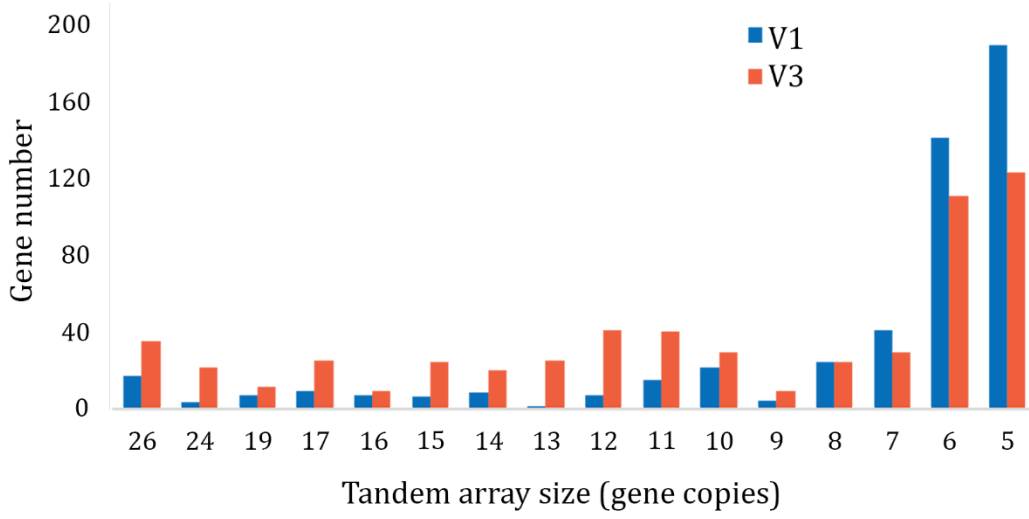

**Figure 3. Comparison of tandem gene array sizes in the V1 and V3 black raspberry assemblies.** The number of genes found in both the V1 and V3 assemblies (Blue) or only V3 (orange) is plotted for tandem arrays ranging in size from 5-26 copies. Array size is based on the V3 annotation.

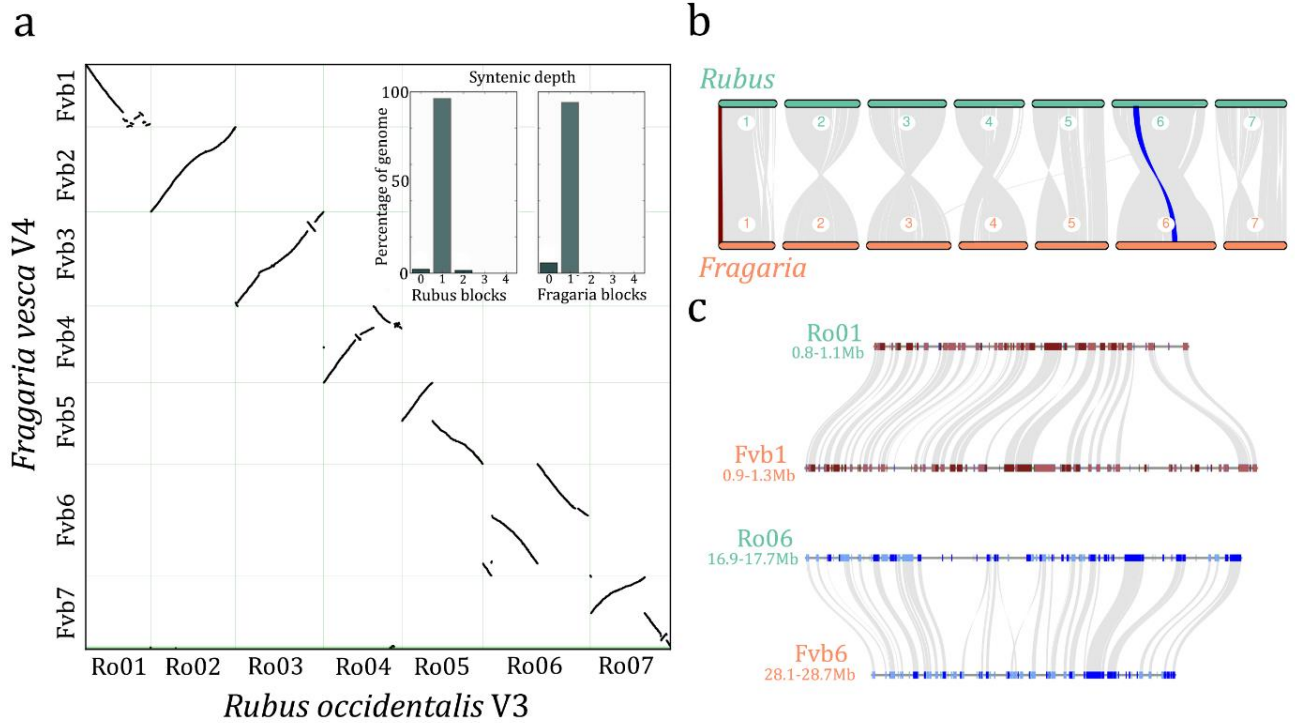

**Figure 4. Comparative genomics of the black raspberry V3 and woodland strawberry (*Fragaria vesca*) V4 genomes.** (a) Macrosyntentic dot plot between the black raspberry and *F. vesca* genomes. Each black dot represents a syntenic region between the two genomes. The inlaid bar graph shows syntenic depth of each red raspberry and *F. vesca* syntenic block. (b) Chromosome scale collinearity between black raspberry and *F. vesca*. The red collinear regions between Ro01 and Fvb1 blue regions between are Ro06 and Fvb6 shown in more detail in c. (c) Microsynteny of two regions showing lineage specific expansion in Fvb1 (top comparison) and Ro06 (bottom). Genes are shown in red or blue (top and bottom respectively) with colors indicating gene orientation (light are forward, dark are reverse). Syntenic gene pairs are connected by gray lines.

1  
2  
3  
4  
5  
6  
7  
8  
9  
10  
11  
12  
13  
14  
15  
16  
17  
18  
19  
20  
21  
22  
23  
24  
25  
26  
27  
28  
29  
30  
31  
32  
33  
34  
35  
36  
37  
38  
39  
40  
41  
42  
43  
44  
45  
46  
47  
48  
49  
50  
51  
52  
53  
54  
55  
56  
57  
58  
59  
60  
61  
62  
63  
64  
65

391 **Table 1.** Comparison of the black raspberry V1 and V3 assemblies

392

|                            | <b>V1</b> | <b>V3</b> |
|----------------------------|-----------|-----------|
| <b>Number of contigs</b>   | 11,936    | 235       |
| <b>Number of scaffolds</b> | 2,226     | 7         |
| <b>Contig N50</b>          | 33.1 kb   | 5.1 Mb    |
| <b>Scaffold N50</b>        | 0.35 Mb   | 41.1 Mb   |
| <b>LTR composition (%)</b> | 16.20%    | 32.60%    |
| <b>Number of genes</b>     | 28,005    | 34,545    |

393

394  
395  
396  
397 **Table 2.** Summary of chromosome anchoring using the HiC genome map.

| <b>Chromosome</b> | <b>Anchored contigs</b> | <b>Total size (bp)</b> |
|-------------------|-------------------------|------------------------|
| Ro01              | 19                      | 34,302,027             |
| Ro02              | 19                      | 40,757,823             |
| Ro03              | 30                      | 43,767,452             |
| Ro04              | 30                      | 38,746,748             |
| Ro05              | 25                      | 41,095,993             |
| Ro06              | 37                      | 50,854,034             |
| Ro07              | 75                      | 41,277,220             |
| <b>Total</b>      | <b>235</b>              | <b>290,801,297</b>     |

398

399



Click here to access/download  
**Supplementary Material**  
Supplement\_1-19-18.docx



Supplement: giy094_giga-d-18-00032_original_submission.pdf [file giy094_giga-d-18-00032_original_submission.pdf]
